# Supplementary material for: Substituted Co–Cu–Zn nanoferrites: synthesis, fundamental and redox catalytic properties for the degradation of methyl orange
Source: Royal Society of Chemistry journal article supplement (doi:10.1039/c5ra22561b), 2015-12-18
Supplement: c5ra22561b1.pdf [file c5ra22561b1.pdf]

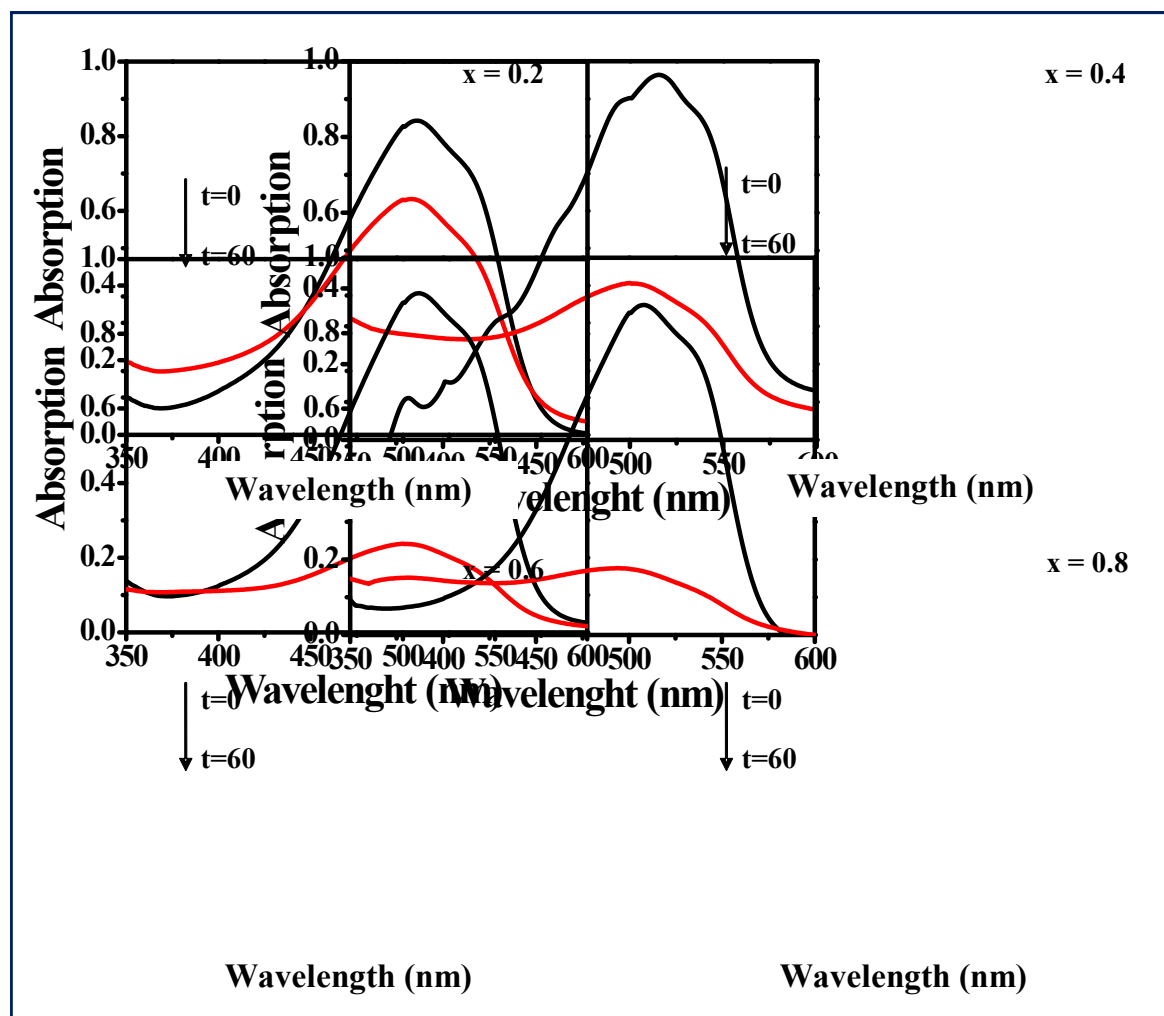

Fig. S1: Change in absorption with time of methyl orange solution in the presence of  $\text{Co}_{0.6}\text{Zn}_{0.4}\text{Cu}_{0.2}\text{Co}_x\text{Fe}_{1.8-x}\text{O}_4$  annealed at  $1000^\circ\text{C}$ .

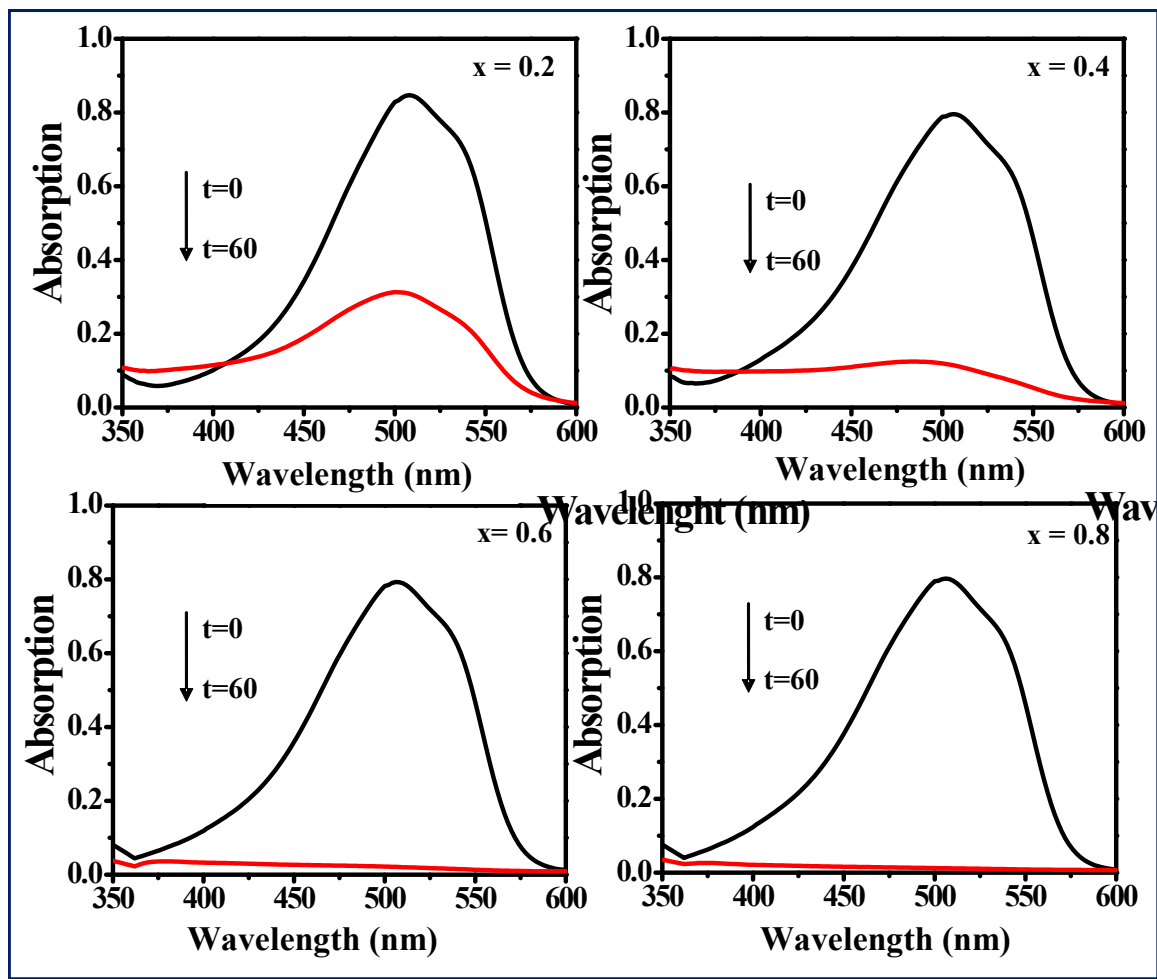

Fig. S2: Change in absorption with time of methyl orange solution in the presence of  $\text{Co}_{0.6}\text{Zn}_{0.4}\text{Cu}_{0.2}\text{Zn}_x\text{Fe}_{1.8-x}\text{O}_4$  annealed at  $1000^\circ\text{C}$ .

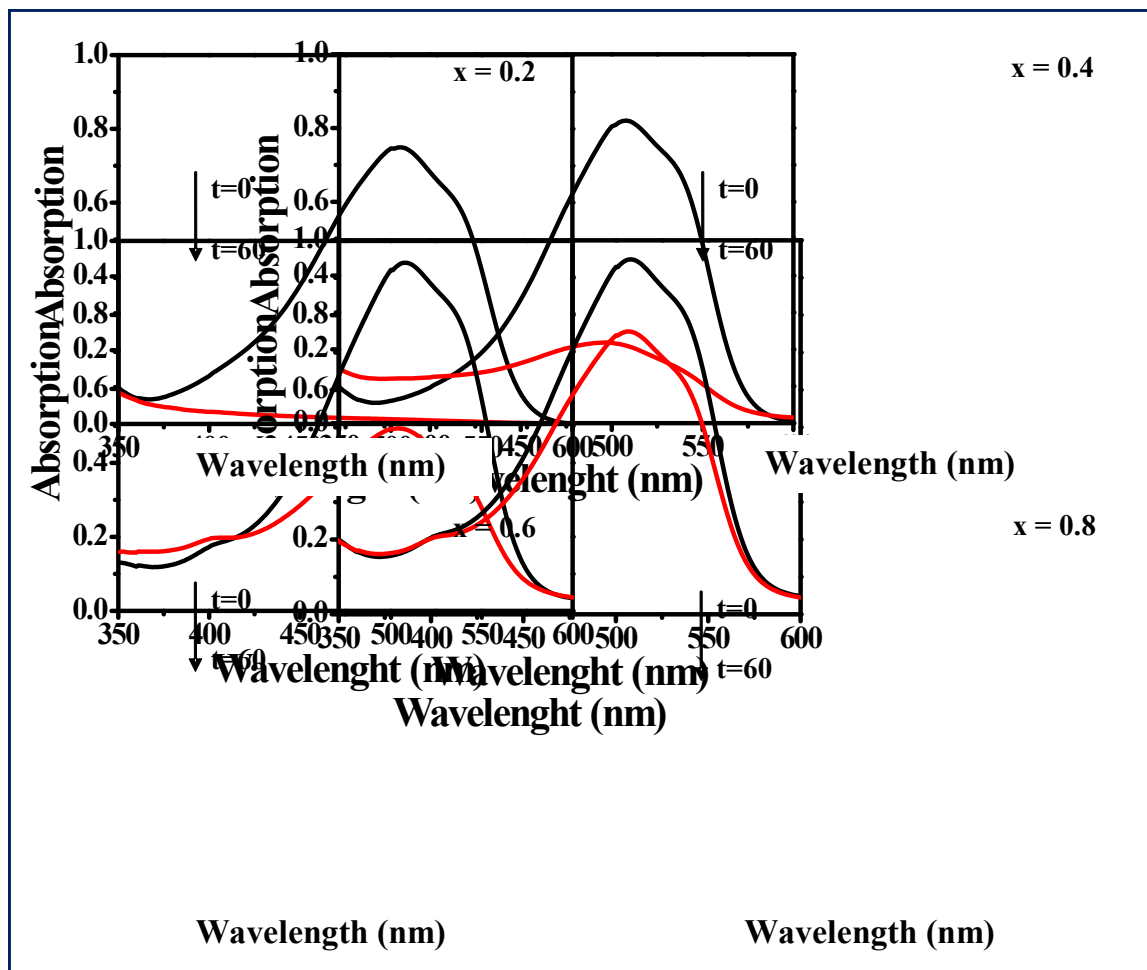

Fig. S3: Change in absorption with time of methyl orange solution in the presence of  $\text{Co}_{0.6}\text{Zn}_{0.4}\text{Cu}_{0.2}\text{Ni}_x\text{Fe}_{1.8-x}\text{O}_4$  annealed at  $1000\text{ }^\circ\text{C}$
